# Supplementary material for: Single Nucleotide Polymorphisms of the RAC1 Gene as Novel Susceptibility Markers for Neuropathy and Microvascular Complications in Type 2 Diabetes
Source: MDPI journal article supplement (doi:10.3390/biomedicines11030981), 2023-03-22
Supplement: s1 [file s1]

**Table S2.** Genotype frequencies for the studied *RAC1* gene polymorphisms among T2D patients with and without diabetic foot syndrome (DFS)

| RAC1<br>SNP ID    | Genotype | T2D patients         |                   | P <sup>1</sup> | OR (95% CI) <sup>2</sup> |
|-------------------|----------|----------------------|-------------------|----------------|--------------------------|
|                   |          | Without DFS<br>n (%) | With DFS<br>n (%) |                |                          |
| Entire group      |          |                      |                   |                |                          |
| rs4724800<br>A>G  | A/A      | 745 (57.5)           | 68 (63.5)         | 0.35<br>(0.73) | 1.00                     |
|                   | A/G      | 485 (37.5)           | 36 (33.6)         |                | 0.82 (0.54-1.25)         |
|                   | G/G      | 65 (5)               | 3 (2.8)           |                | 0.51 (0.16-1.67)         |
| rs7784465<br>T>C  | T/T      | 801 (63.6)           | 63 (60)           | 0.46<br>(0.73) | 1.00                     |
|                   | T/C      | 406 (32.2)           | 35 (33.3)         |                | 1.09 (0.71-1.68)         |
|                   | C/C      | 52 (4.1)             | 7 (6.7)           |                | 1.73 (0.75-3.99)         |
| rs10951982<br>G>A | G/G      | 805 (62.3)           | 69 (65.1)         | 0.42<br>(0.73) | 1.00                     |
|                   | G/A      | 433 (33.5)           | 35 (33)           |                | 0.95 (0.62-1.45)         |
|                   | A/A      | 55 (4.2)             | 2 (1.9)           |                | 0.43 (0.10-1.79)         |
| rs10238136<br>A>T | A/A      | 1210 (94.8)          | 97 (91.5)         | 0.17<br>(0.73) | 1.00                     |
|                   | A/T      | 66 (5.2)             | 8 (7.5)           |                | 1.56 (0.73-3.36)         |
|                   | T/T      | 1 (0.1)              | 1 (0.9)           |                | 11.37 (0.70-184.13)      |
| rs836478<br>C>T   | C/C      | 365 (28.6)           | 34 (32.1)         | 0.32<br>(0.73) | 1.00                     |
|                   | C/T      | 633 (49.6)           | 45 (42.5)         |                | 0.75 (0.47-1.20)         |
|                   | T/T      | 278 (21.8)           | 27 (25.5)         |                | 1.04 (0.61-1.77)         |
| rs9374<br>G>A     | G/G      | 798 (62.5)           | 70 (65.4)         | 0.57<br>(0.73) | 1.00                     |
|                   | G/A      | 432 (33.9)           | 35 (32.7)         |                | 0.93 (0.61-1.42)         |
|                   | A/A      | 46 (3.6)             | 2 (1.9)           |                | 0.50 (0.12-2.12)         |
| Males             |          |                      |                   |                |                          |
| rs4724800<br>A>G  | A/A      | 245 (58.3)           | 23 (67.7)         | 0.51<br>(0.73) | 1.00                     |
|                   | A/G      | 156 (37.1)           | 10 (29.4)         |                | 0.66 (0.31-1.44)         |
|                   | G/G      | 19 (4.5)             | 1 (2.9)           |                | 0.55 (0.07-4.32)         |
| rs7784465<br>T>C  | T/T      | 258 (62.6)           | 18 (56.2)         | 0.27<br>(0.73) | 1.00                     |
|                   | T/C      | 140 (34)             | 14 (43.8)         |                | 1.40 (0.68-2.92)         |
|                   | C/C      | 14 (3.4)             | 0 (0)             |                | 0.00 (0.00-NA)           |
| rs10951982<br>G>A | G/G      | 266 (63.3)           | 21 (63.6)         | 0.95<br>(0.96) | 1.00                     |
|                   | G/A      | 137 (32.6)           | 11 (33.3)         |                | 1.01 (0.47-2.16)         |
|                   | A/A      | 17 (4)               | 1 (3)             |                | 0.72 (0.09-5.75)         |
| rs10238136<br>A>T | A/A      | 390 (94.4)           | 28 (84.8)         | 0.04<br>(0.72) | 1.00                     |
|                   | A/T      | 23 (5.6)             | 4 (12.1)          |                | 2.42 (0.78-7.55)         |
|                   | T/T      | 0 (0)                | 1 (3)             |                | NA (0.00-NA)             |
| rs836478<br>C>T   | C/C      | 110 (26.4)           | 8 (23.5)          | 0.61<br>(0.73) | 1.00                     |
|                   | C/T      | 215 (51.6)           | 16 (47.1)         |                | 1.03 (0.43-2.50)         |
|                   | T/T      | 92 (22.1)            | 10 (29.4)         |                | 1.54 (0.58-4.07)         |
| rs9374<br>G>A     | G/G      | 266 (63.6)           | 22 (64.7)         | 0.96<br>(0.96) | 1.00                     |
|                   | G/A      | 137 (32.8)           | 11 (32.4)         |                | 0.96 (0.45-2.05)         |
|                   | A/A      | 15 (3.6)             | 1 (2.9)           |                | 0.76 (0.09-6.15)         |
| Females           |          |                      |                   |                |                          |
| rs4724800         | A/A      | 500 (57.1)           | 45 (61.6)         | 0.55           | 1.00                     |

|            |     |            |           |        |                  |
|------------|-----|------------|-----------|--------|------------------|
| A>G        | A/G | 329 (37.6) | 26 (35.6) | (0.73) | 0.90 (0.54-1.49) |
|            | G/G | 46 (5.3)   | 2 (2.7)   |        | 0.49 (0.11-2.08) |
| rs7784465  | T/T | 543 (64.1) | 45 (61.6) |        | 1.00             |
|            | T/C | 266 (31.4) | 21 (28.8) | 0.21   | 0.93 (0.54-1.60) |
| T>C        | C/C | 38 (4.5)   | 7 (9.6)   | (0.73) | 2.22 (0.94-5.28) |
|            | G/G | 539 (61.7) | 48 (65.8) |        | 1.00             |
| rs10951982 | G/A | 296 (33.9) | 24 (32.9) | 0.37   | 0.92 (0.55-1.54) |
|            | A/A | 38 (4.3)   | 1 (1.4)   | (0.73) | 0.30 (0.04-2.26) |
| rs10238136 | A/A | 820 (94.9) | 69 (94.5) |        | 1.00             |
|            | A/T | 43 (5)     | 4 (5.5)   | 0.87   | 1.17 (0.41-3.38) |
| A>T        | T/T | 1 (0.1)    | 0 (0)     | (0.96) | 0.00 (0.00-NA)   |
|            | C/C | 255 (29.7) | 26 (36.1) |        | 1.00             |
| rs836478   | C/T | 418 (48.7) | 29 (40.3) | 0.31   | 0.66 (0.38-1.15) |
|            | T/T | 186 (21.6) | 17 (23.6) | (0.73) | 0.90 (0.48-1.72) |
| rs9374     | G/G | 532 (62)   | 48 (65.8) |        | 1.00             |
|            | G/A | 295 (34.4) | 24 (32.9) | 0.53   | 0.92 (0.55-1.53) |
| G>A        | A/A | 31 (3.6)   | 1 (1.4)   | (0.73) | 0.37 (0.05-2.81) |

<sup>1</sup>Significance level adjusted for age, sex and BMI.

<sup>2</sup>Odds ratio with 95% confidence intervals adjusted for age, sex and BMI (codominant genetic model).

Bold is statistically significant *P*- and *Q*-values.
