# Supplementary material for: Single Nucleotide Polymorphisms of the RAC1 Gene as Novel Susceptibility Markers for Neuropathy and Microvascular Complications in Type 2 Diabetes
Source: MDPI journal article supplement (doi:10.3390/biomedicines11030981), 2023-03-22
Supplement: s1 [file s1]

**Table S1.** Estimated common haplotype frequencies of *RAC1* gene in T2D patients with and without DNF

| SNPs                                       | rs4724800 | rs7784465 | rs10951982 | rs10238136 | rs836478 | rs9374 | T2D patients                     |          | OR (95% CI) <sup>2</sup> | P <sup>3</sup> (Q) |
|--------------------------------------------|-----------|-----------|------------|------------|----------|--------|----------------------------------|----------|--------------------------|--------------------|
|                                            |           |           |            |            |          |        | Without DNF                      | With DNF |                          |                    |
|                                            |           |           |            |            |          |        | Haplotype frequency <sup>1</sup> |          |                          |                    |
| H                                          |           |           |            |            |          |        |                                  |          |                          |                    |
| Entire group                               |           |           |            |            |          |        |                                  |          |                          |                    |
| Global haplotype association p-value: 0.73 |           |           |            |            |          |        |                                  |          |                          |                    |
| H1                                         | A         | T         | G          | A          | C        | G      | 0.4824                           | 0.4744   | 1.00                     | ---                |
| H2                                         | A         | C         | G          | A          | T        | G      | 0.1697                           | 0.1852   | 1.09 (0.86 - 1.37)       | 0.48 (0.79)        |
| H3                                         | G         | T         | A          | A          | T        | A      | 0.1654                           | 0.1816   | 1.17 (0.92 - 1.47)       | 0.20 (0.73)        |
| H4                                         | A         | T         | G          | A          | T        | G      | 0.0800                           | 0.0664   | 0.93 (0.66 - 1.32)       | 0.70 (1.0)         |
| H5                                         | G         | T         | G          | A          | C        | G      | 0.0217                           | 0.0256   | 1.30 (0.75 - 2.27)       | 0.35 (0.79)        |
| H6                                         | G         | T         | A          | A          | C        | A      | 0.0247                           | 0.0167   | 0.70 (0.36 - 1.36)       | 0.29 (0.79)        |
| H7                                         | A         | T         | G          | T          | T        | G      | 0.0184                           | 0.0156   | 1.01 (0.51 - 1.98)       | 0.98 (1.0)         |
| rare                                       | *         | *         | *          | *          | *        | *      | 0.0106                           | 0.0047   | 0.94 (0.57 - 1.57)       | 0.83 (1.0)         |
| Males                                      |           |           |            |            |          |        |                                  |          |                          |                    |
| Global haplotype association p-value: 0.21 |           |           |            |            |          |        |                                  |          |                          |                    |
| H1                                         | A         | T         | G          | A          | C        | G      | 0.4838                           | 0.4312   | 1.00                     | ---                |
| H2                                         | A         | C         | G          | A          | T        | G      | 0.1487                           | 0.1920   | 1.53 (0.95 - 2.46)       | 0.078 (0.73)       |
| H3                                         | G         | T         | A          | A          | T        | A      | 0.1736                           | 0.1808   | 1.17 (0.76 - 1.83)       | 0.48 (0.79)        |
| H4                                         | A         | T         | G          | A          | T        | G      | 0.0836                           | 0.1143   | 1.59 (0.91 - 2.76)       | 0.10 (0.73)        |
| H5                                         | G         | T         | G          | A          | C        | G      | 0.0240                           | 0.0068   | 0.59 (0.13 - 2.68)       | 0.50 (0.79)        |
| H6                                         | G         | T         | A          | A          | C        | A      | 0.0216                           | 0.0221   | 1.07 (0.34 - 3.40)       | 0.91 (1.0)         |
| H7                                         | A         | T         | G          | T          | T        | G      | 0.0238                           | 0.0297   | 1.38 (0.54 - 3.53)       | 0.50 (0.79)        |
| H8                                         | A         | C         | G          | A          | C        | G      | 0.0154                           | NA       | 0.00 (-Inf - Inf)        | 1 (1.0)            |
| rare                                       | *         | *         | *          | *          | *        | *      | 0.0049                           | 0        | 0.85 (0.24 - 3.04)       | 0.8 (1.0)          |
| Females                                    |           |           |            |            |          |        |                                  |          |                          |                    |
| Global haplotype association p-value: 0.25 |           |           |            |            |          |        |                                  |          |                          |                    |
| H1                                         | A         | T         | G          | A          | C        | G      | 0.4811                           | 0.4858   | 1.00                     | ---                |
| H2                                         | A         | C         | G          | A          | T        | G      | 0.1854                           | 0.1837   | 0.98 (0.75 - 1.27)       | 0.88 (1.0)         |
| H3                                         | G         | T         | A          | A          | T        | A      | 0.1591                           | 0.1819   | 1.14 (0.87 - 1.51)       | 0.34 (0.79)        |
| H4                                         | A         | T         | G          | A          | T        | G      | 0.0777                           | 0.0547   | 0.71 (0.46 - 1.08)       | 0.11 (0.73)        |
| H5                                         | G         | T         | G          | A          | C        | G      | 0.0199                           | 0.0285   | 1.54 (0.79 - 2.99)       | 0.20 (0.73)        |
| H6                                         | G         | T         | A          | A          | C        | A      | 0.0272                           | 0.0152   | 0.57 (0.26 - 1.24)       | 0.15 (0.73)        |
| H7                                         | A         | T         | G          | T          | T        | G      | 0.0147                           | 0.0122   | 0.72 (0.30 - 1.73)       | 0.46 (0.79)        |
| rare                                       | *         | *         | *          | *          | *        | *      | 0.0072                           | 0.0057   | 1.08 (0.61 - 1.92)       | 0.79 (1.0)         |

<sup>1</sup>Rare haplotypes with frequency < 0.01 are not shown.

<sup>2</sup>Odds ratio with 95% confidence intervals adjusted for age, sex and BMI (codominant genetic model).

<sup>3</sup>Significance level adjusted for age, sex and BMI.

Bold is statistically significant P- and Q-values. H - haplotype
